# Supplementary material
Source: publisher site journal article supplement (https://www.dovepress.com/article/96883)
Supplement: Supplementary file 1 [file get_supplementary_file.php]

Table S1: Summary of magnitude of HIV-VL co-infection

| Author(s)<br>year of publication | Country  | Focus of study (Objectives)                                                                                                     | Methods                       | Participants                                                                                                                     | Main findings                                                                                                                                                                                                                                                                                                                                                                                   |
|----------------------------------|----------|---------------------------------------------------------------------------------------------------------------------------------|-------------------------------|----------------------------------------------------------------------------------------------------------------------------------|-------------------------------------------------------------------------------------------------------------------------------------------------------------------------------------------------------------------------------------------------------------------------------------------------------------------------------------------------------------------------------------------------|
| Rachel ter Horst et al., 2008    | Ethiopia | To assess its impact and to identify determinants of VL relapse and survival                                                    | Longitudinal follow up study  | <b>1947 consecutive pts were followed and 604 were co-infected with HIV-VL</b>                                                   | <ul style="list-style-type: none"> <li>• Among 195 pts receiving ART, 31.3% had <math>\geq 1</math> VL &amp; 14.4% dead</li> <li>• Among 161 pts who did not receive ART, 26.1% had <math>\geq 1</math> VL &amp; 6.8% dead</li> <li>• 54 pts who received ART &amp; 58 pts who didn't receive ART had <math>\geq 1</math> VL relapse</li> </ul>                                                 |
| Koert Ritmeijer et al., 2011     | Ethiopia | To assess the effectiveness of high-dose AmBisome monotherapy and identify risk factors for treatment failure.                  | Retrospective cohort analysis | <ul style="list-style-type: none"> <li>• 289 VL pts included in the analysis</li> <li>• <b>195 HIV-VL co-infected</b></li> </ul> | <ul style="list-style-type: none"> <li>• Of the 195 HIV-VL pts , 116 (59.5%) had primary VL and 79 (40.5%) had VL relapse.</li> <li>• High dose AmBisom for VL is safe and effective in severely ill HIV pts, safe but less effective in HIV+ pts. Combining AmBisome with another drug may enhance its effectiveness in HIV+ VL pts. SSG should be avoided for tx of VL in HIV pts.</li> </ul> |
| Prabhat K. Sinha et al., 2011    | India    | To assess the long-term treatment outcomes in VL-HIV-coinfected patients treated with liposomal amphotericin B                  | Retrospective cohort study    | <b>55 cART-naive VL-HIV infected patients</b>                                                                                    | <ul style="list-style-type: none"> <li>• The median CD4 cell count at VL diagnosis was 66cells/<math>\mu</math>L</li> <li>• 27 pts (49.1%) presented with VL relapse</li> <li>• The overall tolerance of Liposomal amphoterecine B was excellent, with no interrupted treatment.</li> </ul>                                                                                                     |
| Zewdu Hurissa et al., 2010       | Ethiopia | To describe the clinical presentation of pts with VL with and without HIV co-infection and factors associated with poor outcome | Retrospective review          | <ul style="list-style-type: none"> <li>• 241 VL pts included in the analysis</li> <li>• <b>92 HIV-VL co-infected</b></li> </ul>  | <ul style="list-style-type: none"> <li>• Co-infected patients had a poorer outcome i.e. either death or treatment failure (31.5% vs. 5.6%,<math>P &lt; 0.001</math>).</li> </ul>                                                                                                                                                                                                                |

|                                |            |                                                                                                                                                      |                                                |                                                                                                                                                                                                                               |                                                                                                                                                                                                                                                                                                                                                                              |
|--------------------------------|------------|------------------------------------------------------------------------------------------------------------------------------------------------------|------------------------------------------------|-------------------------------------------------------------------------------------------------------------------------------------------------------------------------------------------------------------------------------|------------------------------------------------------------------------------------------------------------------------------------------------------------------------------------------------------------------------------------------------------------------------------------------------------------------------------------------------------------------------------|
| JOSE A. MIRA et al., 2004      | Spain      | To assess the frequency of VL relapses in individuals receiving HAART                                                                                | Retrospective cohort study                     | <b>1715 pts who received HAART and 87 were HIV-VL co-infected</b>                                                                                                                                                             | <ul style="list-style-type: none"> <li>• 10 of them received secondary chemoprophylaxis &amp; the rest didn't</li> <li>• 8 (38%) pts without secondary chemoprophylaxis showed a VL relapse</li> <li>• The frequency of VL relapses in pts receiving HAART is high.</li> </ul>                                                                                               |
| Iúri Paz Lima et al., 2013     | S. America | To describe the coinfection HIV/L. infantum in order to highlight the importance of the problem and to discuss the clinical characteristics          | Both Retrospective & prospective cohort study  | 224 pts with HIV-VL (L-infatum) were included in the study                                                                                                                                                                    | <ul style="list-style-type: none"> <li>• 185 (83.2%) pts were male, principally between 20-40 years of age</li> <li>• 16.8% of the cohort died</li> </ul>                                                                                                                                                                                                                    |
| Rafael de la Rosa et al., 2002 | Spain      | To assess whether the extensive use of HAART has decreased the incidence of symptomatic VL in HIV-infected patients & its risk factors for overt VL. | Longitudinal follow up study                   | <ul style="list-style-type: none"> <li>• 479 HIV-1 infected pts receiving HAART were included in the analysis</li> <li>• <b>21 pts were found to be VL-HIV co-infected</b></li> </ul>                                         | <ul style="list-style-type: none"> <li>• The use of HAART is the main independent factor associated with VL (protective)</li> <li>• CDC clinical category C at entry of the cohort &amp; CD4+ cell counts below 300 cells/mm<sup>3</sup> during the follow up were also independently associated to VL</li> </ul>                                                            |
| JUAN A. PINEDA et al., 1998    | S. Spain   | To appraise the prevalence of VL in patients infected with HIV-1 in S. Spain and to identify factors associated with this disease                    | Cross-sectional study design                   | <ul style="list-style-type: none"> <li>• 291 HIV-1 infected pts were included in the analysis</li> <li>• <b>32 pts were found to be VL-HIV co-infected of them 13 (41%) pts were found to be subclinical cases</b></li> </ul> | <ul style="list-style-type: none"> <li>• CDC clinical category C was the factor most strongly associated with the disease.</li> <li>• Pts with subclinical cases of infection were found in all CDC categories.</li> <li>• IVDU showed a higher prevalence than the remaining pts but such an association was not independent.</li> </ul>                                    |
| Mulat Yimer et al., 2014       | Ethiopia   | To determine the proportion of VL/HIV co-infection among clinically confirmed VL patients in the endemic foci of the Amhara Region.                  | Institution based Cross-sectional study design | <ul style="list-style-type: none"> <li>• 409 HIV infected pts were included in the analysis</li> <li>• <b>74 (18.1%) pts were found to be VL-HIV co-infected</b></li> </ul>                                                   | <ul style="list-style-type: none"> <li>• Males were more VL/HIV co-infected 74 (19.4%) than females (0%) (P &lt; 0.012)</li> <li>• The age groups from 21-35 were the highest infected group 68 (16.6%) (P &lt; 0.001)</li> <li>• Those patients who came from rural areas were more VL/ HIV co-infected 46 (35.1%) than urban dwellers 28 (23.1%) (P &lt; 0.001)</li> </ul> |

|                                                          |          |                                                                                                                                                                                                                              |                                    |                                                                                                                                                                                         |                                                                                                                                                                                                                                                                                                                                                                                                                        |
|----------------------------------------------------------|----------|------------------------------------------------------------------------------------------------------------------------------------------------------------------------------------------------------------------------------|------------------------------------|-----------------------------------------------------------------------------------------------------------------------------------------------------------------------------------------|------------------------------------------------------------------------------------------------------------------------------------------------------------------------------------------------------------------------------------------------------------------------------------------------------------------------------------------------------------------------------------------------------------------------|
| Suzi Lyons et al., 2003                                  | Ethiopia | To identify characteristics that increased the risk of mortality in Ethiopian VL patients                                                                                                                                    | Retrospective review               | <ul style="list-style-type: none"> <li>791 pts treated for VL were included in the analysis</li> <li>From 213 individuals tested for HIV, <b>49 (23%) were HIV positive.</b></li> </ul> | <ul style="list-style-type: none"> <li>The case fatality rate was 18.5% (146) (95% CI: 15.8–21.3%)</li> <li>HIV+ were more than four times more likely to die than those who tested HIV- (OR 4.5, 95% CI: 1.8–11.4).</li> </ul>                                                                                                                                                                                        |
| Gla'ucia F. Cota, et al., 2014                           | Brazil   | To assess the clinical-laboratory profile and outcomes of VL-HIV-coinfected patients using a group of non HIV infected patients diagnosed with VL during the same period as a comparator.                                    | prospective cohort study           | <ul style="list-style-type: none"> <li>168 pts were evaluated, of whom 90 were confirmed to have VL.</li> <li><b>46 pts (51%) were HIV co-infected</b></li> </ul>                       | <ul style="list-style-type: none"> <li>HIV infected pts had a lower rate of fever &amp; splenomegaly compared with immune-competent pts</li> <li>The VL relapse rate in 6 months was 37% among HIV infected pts despite receiving 2ndary prophylaxis</li> <li>The main risk factors for poor outcomes at 6 months after the end of the treatment were HIV infections, bleeding &amp; a previous VL episode.</li> </ul> |
| Leonardo Cordenonzi Pedroso de Albuquerque, et al., 2014 | Brazil   | To describe the main features of VL, both related to & independent of HIV infection                                                                                                                                          | prospective cohort study           | 1,779 new pts with VL, <b>33 of whom were also infected with HIV</b>                                                                                                                    | <ul style="list-style-type: none"> <li>VL/HIV was more common in pts aged b/n 18 &amp; 50 years.</li> <li>There were more male pts in the VL/HIV group than in the VL group</li> <li>Relapse rates were also considerably higher in the VL/HIV (9.1%) group than in the VL group (1.5%)</li> </ul>                                                                                                                     |
| Getahun Mengistu, et al., 2007                           | Ethiopia | To assess the clinical and laboratory manifestations and factors associated with mortality and morbidity of VL with or without HIV co-infection                                                                              | hospital-based case series study   | <ul style="list-style-type: none"> <li>221 VL pts participated in the study</li> <li>Out of 212 VL cases tested for HIV, <b>87 (41%) were HIV co-infected</b></li> </ul>                | <ul style="list-style-type: none"> <li>The case fatality rates among HIV+ &amp; HIV- VL cases were 39.3% and 13%, respectively.</li> <li>HHIV infection, BMI of 15 &amp; below, bleeding tendency, &amp; age&gt;20 years were identified as independent predictor for death.</li> </ul>                                                                                                                                |
| Sakib Burza, et al., 2014                                | India    | We describe the baseline characteristics of the 159 HIV-VL co-infected patients treated with liposomal amphotericin and then describe the outcomes for VL immediately after treatment and in the longer term (up to 5 years) | retrospective observational cohort | <b>159 VL/HIV co-infected pts (both primary &amp; relapse)</b>                                                                                                                          | <ul style="list-style-type: none"> <li>A total of 36 pts died during follow up, including 6 who died shortly after admission</li> <li>Death occurs at a median of 11 weeks (IQR 4-51) after starting VL treatment</li> <li>Among the 153 pts discharged from the hospital, 26 cases of VL relapse were diagnosed during follow up, occurring at a median of 10 month (IQR 7-14) after discharge.</li> </ul>            |

|                             |       |                                                                                                                     |                        |                                                                           |                                                                                                                                                                                                                                                                                                                                                                                                                                                                        |
|-----------------------------|-------|---------------------------------------------------------------------------------------------------------------------|------------------------|---------------------------------------------------------------------------|------------------------------------------------------------------------------------------------------------------------------------------------------------------------------------------------------------------------------------------------------------------------------------------------------------------------------------------------------------------------------------------------------------------------------------------------------------------------|
| Raman Mahajan, et al., 2015 | India | To assess treatment outcomes of coinfecting patients up to 18 months following treatment with a combination regimen | Retrospective analysis | 102 HIV-VL pts (76% males) were followed a median of 11 months (IQR 4-18) | <ul style="list-style-type: none"> <li>• Cumulative incidence of all cause mortality &amp; VL relapse at 6, 12, &amp; 18 months was 11.7%, 14%, 16.6% a&amp; 2.5%, 6%, 13% respectively.</li> <li>• Cumulative incidence of poor outcome at 6,12, &amp; 18 months was 13.9%, 18.4% &amp; 27.2% respectively.</li> <li>• Not initiating ART &amp; concurred TB were independent risk factors for mortality, where as no factor were associated with relapse.</li> </ul> |
|-----------------------------|-------|---------------------------------------------------------------------------------------------------------------------|------------------------|---------------------------------------------------------------------------|------------------------------------------------------------------------------------------------------------------------------------------------------------------------------------------------------------------------------------------------------------------------------------------------------------------------------------------------------------------------------------------------------------------------------------------------------------------------|

Table S2:- Extraction checklist

| Papers                               | 1                  | 2                  | 3                 | 4                                                                                       | 5                             | 6                                                                       | 7                | 8                | 9                | 10                       | 11               | 12               | 13               | 14               | 15                     |
|--------------------------------------|--------------------|--------------------|-------------------|-----------------------------------------------------------------------------------------|-------------------------------|-------------------------------------------------------------------------|------------------|------------------|------------------|--------------------------|------------------|------------------|------------------|------------------|------------------------|
| Mean/median age                      | 33.5               | 30                 | 35                | 32.2                                                                                    | 36                            | 33                                                                      | 30               | 31               | 32               | 31                       | 25               | 41               | 27               | 25.7             | 36.6                   |
| Male sex                             | 176                | 106                | 46                | 87                                                                                      | 77                            | 29                                                                      | 185              | 178              | 31               | 74                       | 45               | 11               | 26               | 85               | 132                    |
| Mean/median CD4+ cell count/ $\mu$ L | 130                | 155                | 66                | IC                                                                                      | 169                           | 33                                                                      | IC               | IC               | 172              | IC                       | IC               | 91               | IC               | IC               | 122                    |
| VL treatment                         | SSG (356 pts)      | AmBisome (195 pts) | AmBisome (55 pts) | 1 <sup>st</sup> line pentavalent antimonial (SSG, meglumine antimonate) + AmBisom 92 pt | AmBisome + Milefosine 102 pts | 13-Meglumine antimonite 2-pentamiden 9 – AmBisome 2 – AmBlipide complex | IC               | IC               | IC               | IC                       | IC               | AmBisome 46 pts  | IC               | IC               | AmBisome 159 pts       |
| TOC                                  | Was done 4 all pts | Was done 4 all pts | Was done for some | Was done 4 all pts                                                                      | Was not routinely done        | Not reported (NR)                                                       | NR               | NR               | NR               | NR                       | NR               | NP               | NR               | NR               | Was not routinely done |
| Relapse                              | R                  | R                  | R                 | NR                                                                                      | R                             | R                                                                       | NR               | NR               | NR               | NR                       | NR               | R                | R                | NR               | R                      |
| Statistical analysis                 | HR, by Cox model   | Multivariable LR   | HR, by Cox model  | Multivariable LR                                                                        | HR, by Cox model              | K-M and other descriptive analysis was used                             | Multivariable LR | HR, by Cox model | Multivariable LR | Chi-square test was used | Multivariable LR | Multivariable LR | Multivariable LR | Multivariable LR | HR, by Cox model       |

## Key:-

1. VL- Visceral Leishmaniasis
2. SSG – Sodium stibogluconate
3. TOC - test of cure
4. IC – Incomplete
5. R – reported
6. NR – not reported
7. HR - Hazard proportion
8. LR – logistic regression
9. K-M - Kaplan-Meier
